# Supplementary material for: Residue-level elucidation of the ligand-induced protein binding on phenyl-argarose microspheres by NMR hydrogen/deuterium exchange technique
Source: Royal Society of Chemistry journal article supplement (doi:10.1039/c2sm25117e), 2012-01-01
Supplement: c2sm25117e.pdf [file c2sm25117e.pdf]

Cite this: DOI: 10.1039/c0xx00000x

www.rsc.org/xxxxxx

ARTICLE TYPE

Supporting materials:

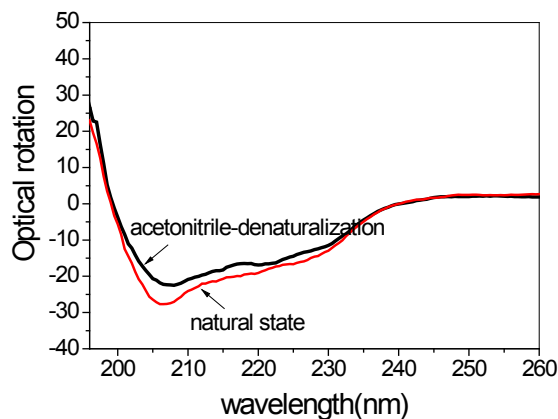

**Fig.S1** Determination of secondary structure by circular dichroism spectra. The spectrum of acetonitrile denaturated lysozyme shows a considerable amount of secondary structure remained. Protein concentration= 0.5mg/ml, acetonitrile solution= 80% (V/V)

5

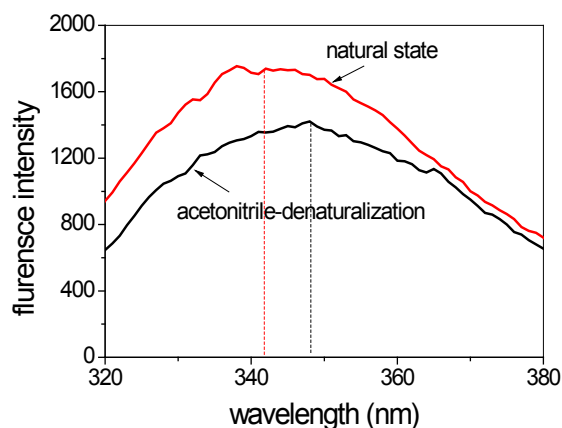

**Fig.S2** Determination of tertiary structure by fluorescence spectra. The shift of fluorescence maximum shows a blue shift of fluorescence emission maximum from natural state to acetonitrile denaturated state. It indicates that tryptophan residues of lysozyme denaturated by acetonitrile are in a more exposed environment of nonpolar solvent and lost some tertiary structure. Protein concentration= 0.3mg/ml, acetonitrile solution= 80% (V/V), at 280 nm.

10

15

20

25

10

5

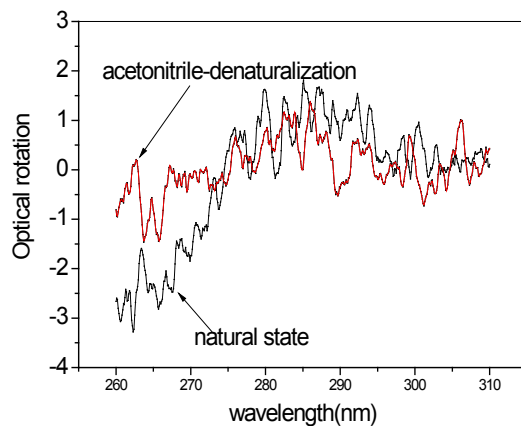

**Fig.S3** Determination of tertiary structure by fluorescence spectra circular dichroism spectra. The spectrum of acetonitrile denaturated lysozyme shows a considerable loss of ordered tertiary structure. Protein concentration= 2mg/ml, acetonitrile solution= 80% (V/V).

15

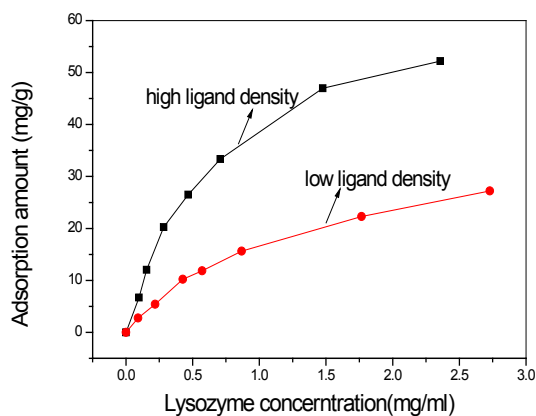

**Fig.S4** Adsorption isotherm of lysozyme on two phenyl-Sepharose 6FF media. High ligand density = 80 pmol phenyl/cm<sup>2</sup> medium, and low ligand density = 50 pmol phenyl/cm<sup>2</sup> medium.

20

30

25

35

5

10

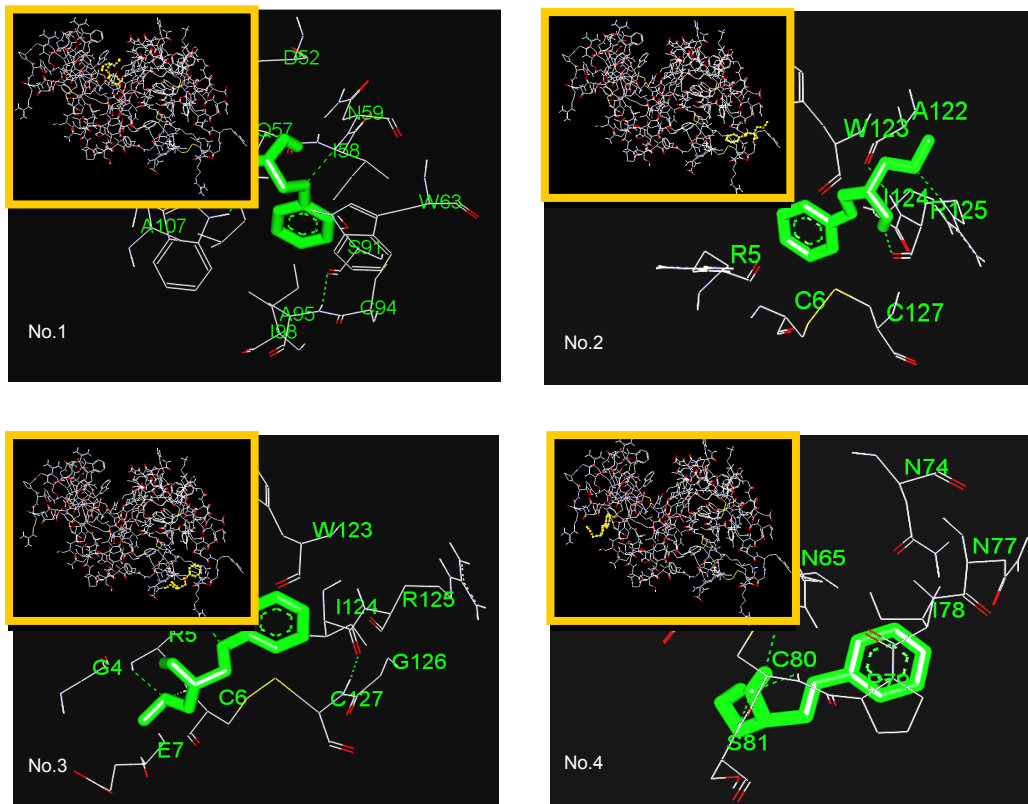

**Fig.S5** The top 4 lysozyme-ligand complexes with the minimum binding energy. The left upper figure plots the ligand distribution on lysozyme.  
 15 According to the reported selection criterion that hydrophobic patches located at convex zones are more accessible to the hydrophobic ligand[1], the conformation of complex ranked at No.1 is discarded due to its location at concave zone of active cleft.

[1] A. Mahn, G. Zapata-Torres, J.A. Asenjo, a theory of protein-resin  
 20 interaction in hydrophobic interaction chromatography, Journal of Chromatography A, 1066, 2005, 81-88
